# Supplementary material for: A mechanically robust polyurethane elastomer with excellent crack tolerance, recyclability and weathering resistance via microphase dynamic ordering
Source: Royal Society of Chemistry journal article supplement (doi:10.1039/d5ta07448g), 2025-01-01
Supplement: d5ta07448g3.pdf [file d5ta07448g3.pdf]

## Supporting Information

### **A Mechanically Robust Polyurethane Elastomer with Excellent Crack Tolerance, recyclability and Weathering Resistance via Microphase Dynamic Ordering**

Rongchi Zhang<sup>a</sup>, Xuanbao Xiang<sup>a</sup>, Donghai Sheng<sup>a</sup>, Lin Zhang<sup>a,\*</sup>, Wanmeng Ren<sup>a</sup>,  
Guoxin Xie<sup>a</sup>, Shutao Wei<sup>b</sup>, Huilian Dai<sup>b</sup>

*a State Key Laboratory of Tribology in Advanced Equipment, Department of Mechanical Engineering, Tsinghua University, Beijing 100084, China*

*b 361°(CHINA)Co., Ltd, Xiamen Fujian 361000, China*

*\* Corresponding author. E-mail: Lin Zhang (zhanglin2020@mail.tsinghua.edu.cn)*

## 1. Characterizations

**Gel Permeation Chromatography (GPC):** The molecular weight and its distribution of elastomers were measured through GPC (Waters 1515 GPC system, Waters Corporation, US). The samples were dissolved in DMF with 0.06 M LiBr at 50 °C with a flow rate of 1.0 mL·min<sup>-1</sup> and an injection volume of 50 µL. **<sup>1</sup>H Nuclear Magnetic Resonance Spectra (<sup>1</sup>H NMR):** The <sup>1</sup>H NMR spectra were collected on a Bruker AV-HD-600X (600 MHz) spectrometer using DMSO-d<sub>6</sub> as solvent. **Fourier Transform Infrared Spectrometer (FTIR):** The functional groups of PU samples were characterized through FTIR (X70, NETZSCH, Germany) with scanning of 32 times and scanning wave number range of 4000 cm<sup>-1</sup> to 400 cm<sup>-1</sup>. **X-ray Diffraction (XRD):** XRD tests were carried out on a D/max-2550(Rigaku, Japan) with Cu Kα radiation. The scanning range was 10 °- 80 ° with a scanning speed of 10 °·min<sup>-1</sup>. **Small Angle X-ray Scattering (SAXS):** 2D-SAXS patterns were obtained on a Xeuss SAXS/WAXS system (Xenocs, France) equipped with a semiconductor detector (Pilatus R 300K, DECTRIS, Switzerland) attached to a multilayer focused Cu Kα X-ray source (GeniX3D Cu ULD, Xenocs, France). The wavelength of X-ray was 0.154 nm. The distance from the sample to the detector was 1165 mm and the exposure time was 60 min. The long period (L) was calculated by Bragg's law:

$$L = \frac{2\pi}{q} \quad (1)$$

where  $q$  is the value of the intensity curves ( $I(q) \sim q$ ). The scattering vector  $q = 4\pi(\sin\theta)/\lambda$ , where  $\lambda$  is the wavelength of X-ray and  $\theta$  is half of the scattering angle ( $2\theta$ ). **Atomic Force Microscopy (AFM):** The microstructure of elastomers was determined by AFM (Probe name: AC160, Dimension, Bruker, Germany) using tapping mode with a scan area of  $1 \times 1 \mu\text{m}^2$ . **Transparency Test:** Transparency tests were conducted with a UV-vis spectrophotometer (PE Lambda950). The scanning wavelength was 800 nm - 400 nm and air was selected as reference. **Differential Scanning Calorimeter (DSC):** DSC data of samples were recorded on a Q5000IR DSC (TA Instruments, America) instrument. During the first cycle, the heat range was from -90 °C to 150 °C with a heating rate of 20 °C·min<sup>-1</sup>, and samples were then cooled to -

90 °C with a cooling rate of 20 °C·min<sup>-1</sup>. All data were collected in the second process to eliminate the thermal history, with samples being heated from -90 °C to 150 °C with a heating rate of 10 °C·min<sup>-1</sup> under nitrogen atmosphere. Thermal Gravimetric Analysis (TGA): Samples of PU elastomers were heated from 25 °C to 600 °C at a rate of 20 °C·min<sup>-1</sup> on a Q5000IR TGA device (TA Instruments, America). All tests were under nitrogen atmosphere. Dynamic Mechanical Analysis (DMA): Dynamic mechanical analyses were performed on the DMA Q800 (Waters, America) under film tension mode with an initial prestress of 0.01 N, a dynamic strain of 0.1 % and a fixed frequency of 1 Hz. The scanning temperature was -90 °C to 100 °C with a heating rate of 3 °C·min<sup>-1</sup>. Stress relaxation test was also conducted on the DMA instrument, during which the samples were maintained under stretching of 100 % strain for 30-minutes relaxation.

Tensile tests: Tensile tests were carried out on an electronic testing machine (AGX-V, Shimadzu, Japan) with a 20 kN load cell. Sample elastomers were cast into dumbbell-shape with an effective area of 20 mm × 5 mm × 3 mm. All tests were performed at a stretching rate of 50 mm·min<sup>-1</sup>. True stress ( $\sigma_t$ ) and true strain ( $\epsilon_t$ ) were calculated according to the engineering stress-strain curve with following equations respectively:

$$\sigma_t = \sigma * \frac{L}{L_0} = \sigma(1 + \epsilon) \quad (2)$$

$$\epsilon_t = \int_{L_0}^L \frac{dL}{L} = \ln \frac{L}{L_0} (1 + \epsilon) \quad (3)$$

where  $\sigma$  is the engineering stress,  $\epsilon$  is the engineering strain,  $L$  is the current length of samples under deformation and  $L_0$  is the original length of samples. Toughness of samples was obtained by integrating engineering stress ( $\sigma$ ) over engineering strain ( $\epsilon$ ), represented by the area under stress-strain curves at a stretching rate of 50 mm·min<sup>-1</sup>. Following equation was used:

$$Toughness = \int_{\epsilon=0}^{\epsilon_{max}} \sigma d\epsilon \quad (4)$$

where  $\sigma$  is the engineering stress,  $\epsilon$  is the engineering strain and  $\epsilon_{max}$  is the elongation at break of samples.

**Cycle tensile tests:** The cycle tensile tests were conducted at a constant deforming rate of  $50 \text{ mm} \cdot \text{min}^{-1}$  during the stretching and releasing period. In each cycle, once the tensile strain set in advance was reached, the moving direction of the sample clamp was reversed and the strain was decreased to zero at the same rate. Immediately after zero stress had been reached, the clamp reversed its moving direction again and the sample was then stretched till the next target strain. The cycle tests were circularly performed until the last cycle was completed. For continuous cyclic stretching test, the samples were stretched to 100 % strain for 50 cycles based on above procedures.

**Fracture energy measurement:** Fracture energy was obtained from the tensile stretching experiments employing the samples which were notched 1 mm long on a single edge (samples in length of 20 mm, width of 5 mm and thickness of 1.25 mm) and all tests were conducted at a stretching rate of  $50 \text{ mm} \cdot \text{min}^{-1}$ . The fracture energy ( $G_c$ ) was calculated by the following equation:<sup>1</sup>

$$G_c = \frac{6wc}{\sqrt{\lambda_c}} \quad (5)$$

where  $c$  is the length of the notch (1 mm here),  $\lambda_c$  is the elongation at break of the notched sample and  $w$  is the integral of the stress-strain curve of the unnotched sample before the strain of  $\lambda_c - 1$ . In addition, the effect of notch sharpness to fracture energy was also explored. Specifically, tests were conducted on samples with varied triangle-shaped notches, which possessed the same notch length ( $c = 1 \text{ mm}$ ) and different notch widths (base of the triangle = 1 mm, 2 mm and 3 mm) and were located in the middle of one edge of the tested samples.

**Trouser tear test:** Tear resistance of elastomers was measured by trouser tear tests at room temperature on an electronic universal testing machine AGX-V (Shimadzu, Japan), which was equipped with a 20 kN load cell. Samples were cropped into  $40 \text{ mm} \times 20 \text{ mm}$  rectangular films with a thickness of 1.25 mm and a 20 mm long tear cut along

the median. Figure 5c presented the diagram of the samples prepared for trouser tear tests. The stretching rate was  $50 \text{ mm} \cdot \text{min}^{-1}$  and the tear energy was calculated by following equation:

$$\text{Tear energy} = \frac{\int_0^L F dL}{t \cdot L_{bulk}} \quad (6)$$

where  $\int_0^L F dL$  represented the integrated area under the curve of load  $F$  versus displacement  $L$ ,  $t$  represented the thickness of the sample and  $L_{bulk}$  represented the length of the tear.

**Healing efficiency:** The healing efficiency of the elastomer were evaluated on a dumbbell-shaped sample ( $20 \text{ mm} \times 5 \text{ mm} \times 3 \text{ mm}$ ). For heat healing, the sample was cut down the middle and the incisions were immediately contacted, after which it was heated to heal under  $100^\circ \text{C}$  for different durations. For solvent healing, the cut surfaces were coated with  $0.6 \text{ uL}$  trace solvent (DMSO), contacted and healed under room temperature for different time. The tensile tests were performed on the healed samples at a stretching rate of  $50 \text{ mm} \cdot \text{min}^{-1}$ . The healing efficiency was determined with tensile strength ( $\eta_\sigma$ ) and elongation at break ( $\eta_\epsilon$ ) and was calculated based on following equations:

$$\eta_\sigma = \frac{\sigma_h}{\sigma_0} \times 100\% \quad (7)$$

$$\eta_\epsilon = \frac{\epsilon_h}{\epsilon_0} \times 100\% \quad (8)$$

where  $\sigma_h$  and  $\epsilon_h$  referred to the tensile strength and elongation at break of the healed sample,  $\sigma_0$  and  $\epsilon_0$  for those parameters of the original sample.

**Weathering resistance tests:** Dumbbell-shaped samples ( $20 \text{ mm} \times 5 \text{ mm} \times 3 \text{ mm}$ ) were prepared and placed in different environments containing water, acid solvent (10%  $\text{H}_2\text{SO}_4$ ), alkali solvent (10%  $\text{NaOH}$ ), oil (PAO 40),  $80^\circ \text{C}$  hot air and UV aging,

respectively. Samples were totally immersed in mentioned liquids, aged in oven or aged by UV lamp of 3.08 mW/cm<sup>2</sup> at 340 nm in a dark chamber (the sample-to-lamp distance was 2 cm). Tensile tests were conducted on aged samples. The degradation rates of strength ( $\eta_s$ ) and elongation at break ( $\eta_e$ ) were calculated as followed:

$$\eta_s = \frac{\sigma_d - \sigma_0}{\sigma_0} \times 100\% \quad (9)$$

$$\eta_e = \frac{\epsilon_d - \epsilon_0}{\epsilon_0} \times 100\% \quad (10)$$

where  $\sigma_d$  and  $\epsilon_d$  referred to the tensile strength and elongation at break of the degraded sample,  $\sigma_0$  and  $\epsilon_0$  for those parameters of the original sample. Besides, samples under water, NaOH, H<sub>2</sub>SO<sub>4</sub> and PAO oil were weighed in different time durations to measure their mass variations.

## 2. Supporting figures

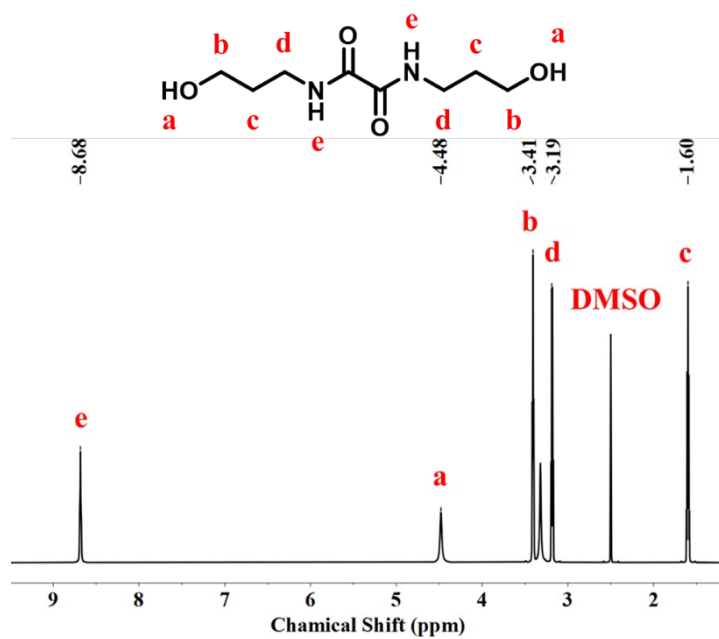

**Figure S1.** <sup>1</sup>H NMR spectrum of BPO dissolved in DMSO-*d*<sub>6</sub>.

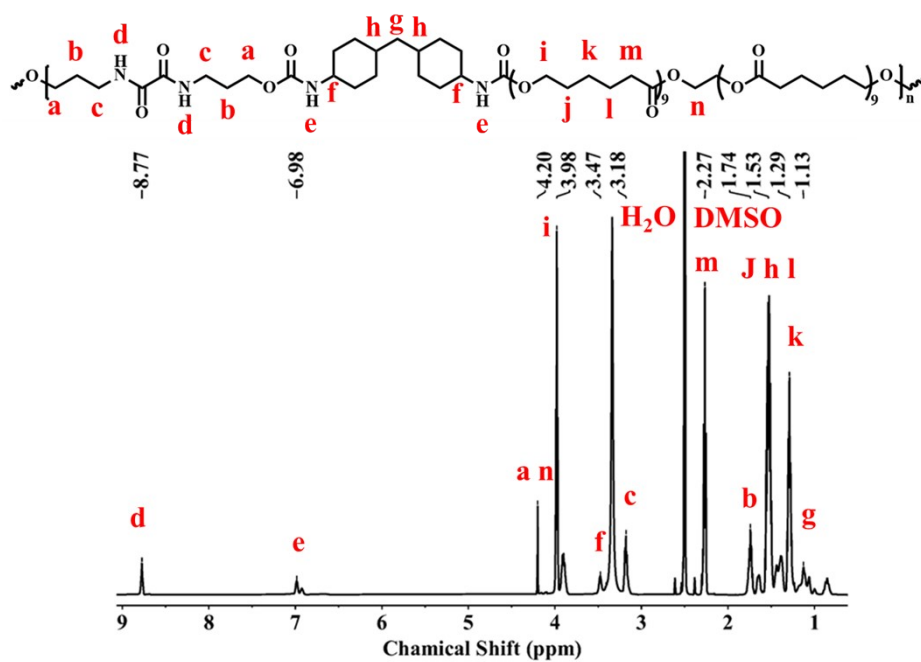

**Figure S2.** <sup>1</sup>H NMR spectrum of HMDI-PCL-BPO dissolved in DMSO-*d*<sub>6</sub>.

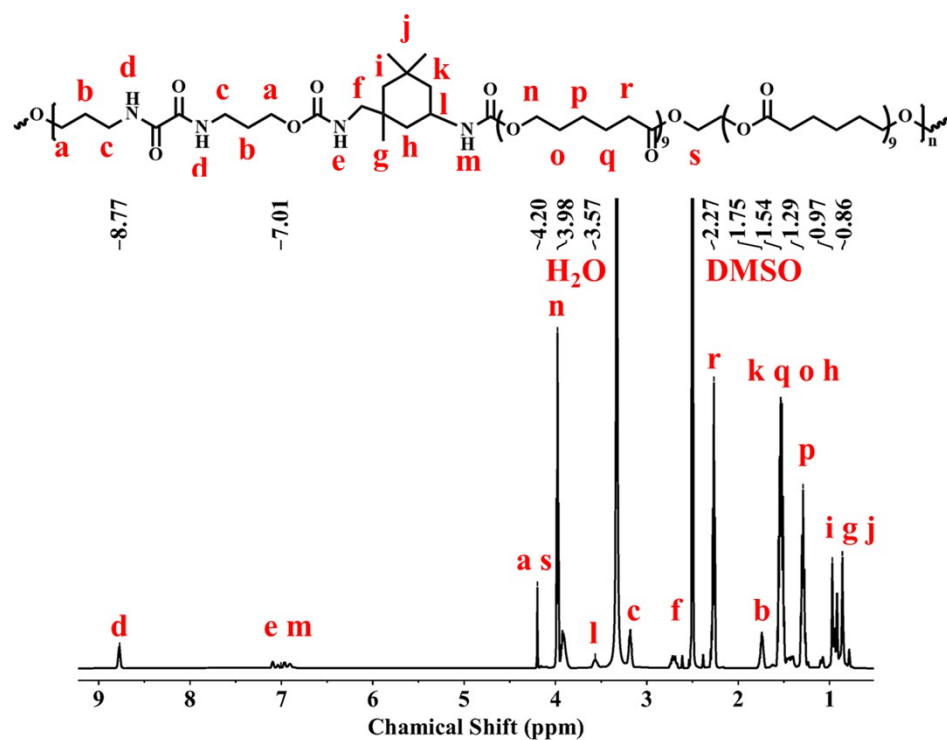

Figure S3.  $^1\text{H}$ NMR spectrum of IPDI-PCL-BPO dissolved in  $\text{DMSO}-d_6$ .

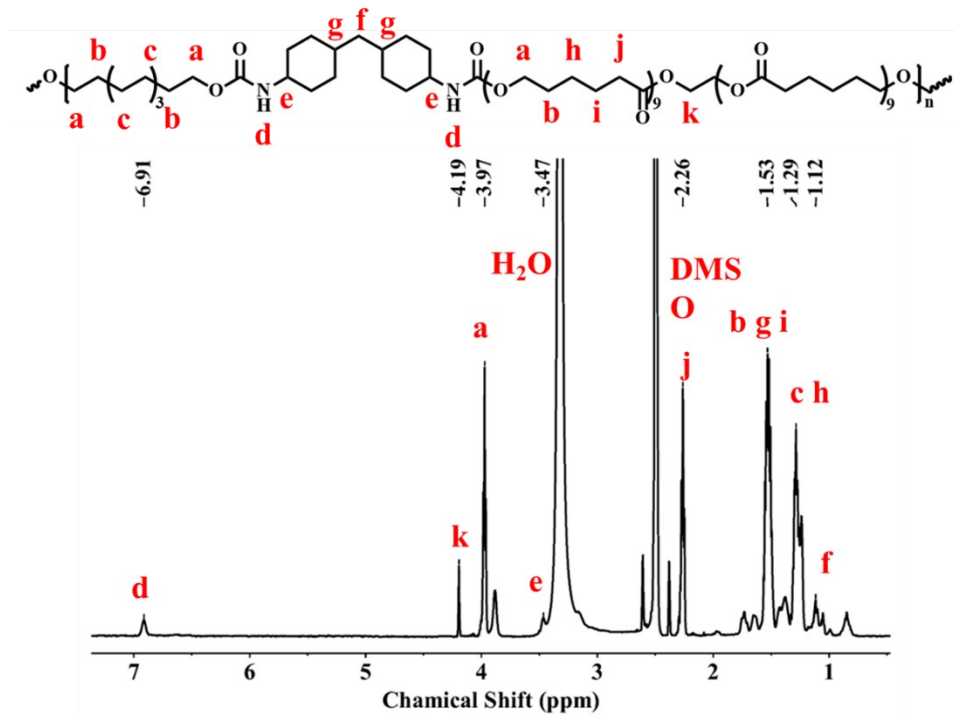

Figure S4.  $^1\text{H}$ NMR spectrum of HMDI-PCL-DDO dissolved in  $\text{DMSO}-d_6$ .



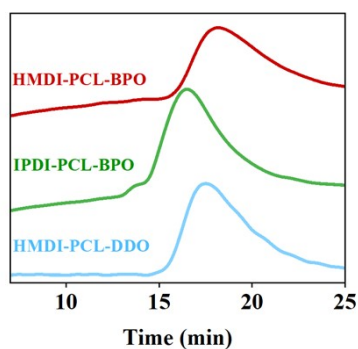

**Figure S5.** GPC traces of HMDI-PCL-BPO, IPDI-PCL-BPO and HMDI-PCL-DDO with DMF as the elution solvent.

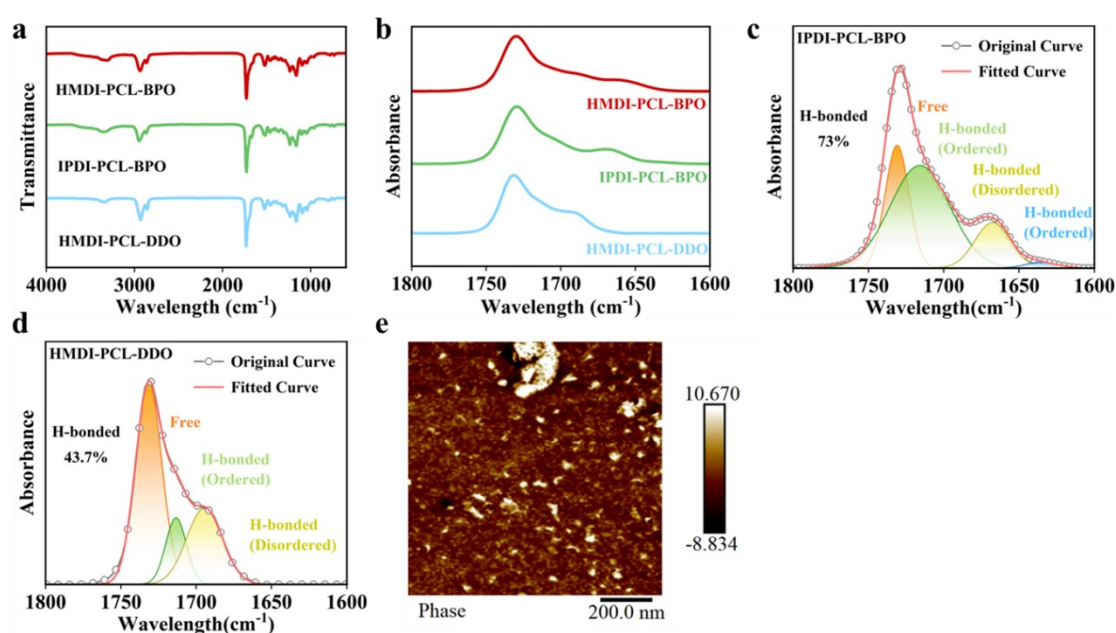

**Figure S6.** (a)(b) FTIR spectra of elastomers in wavenumber range of 4000 – 400  $\text{cm}^{-1}$  (a) and of 1800 – 1600  $\text{cm}^{-1}$  (b). (c)(d) Deconvoluted FTIR spectra of elastomers in the C=O vibration region. (e) AFM phase diagram of HMDI-PCL-DDO.

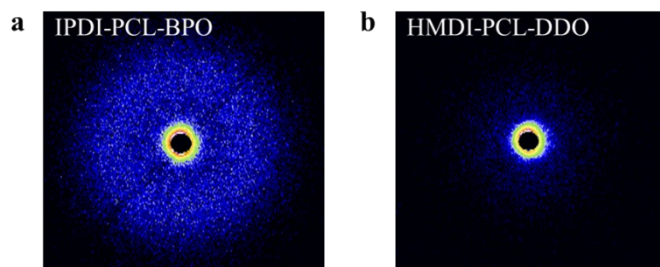

**Figure S7.** (a)(b) 2D SAXS profiles of IPDI-PCL-BPO (a) and HMDI-PCL-DDO (b).

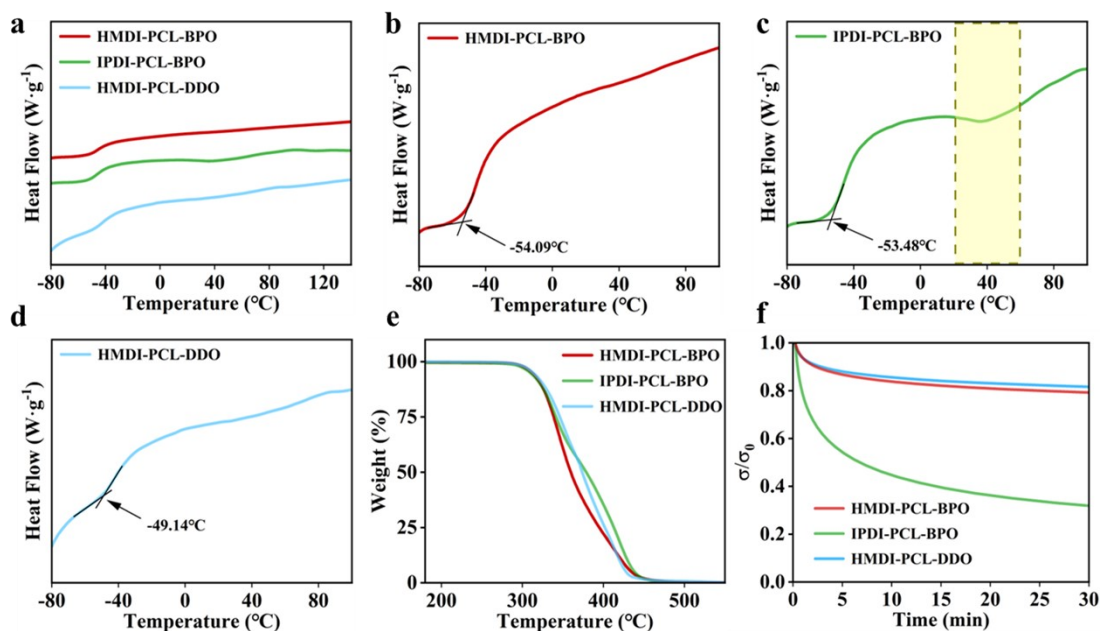

**Figure S8.** (a)-(d) DSC curves of elastomers (a), including HMDI-PCL-BPO (b), IPDI-PCL-BPO (c) and HMDI-PCL-DDO (d). (e) TGA curves of elastomers. (f) Normalized stress relaxation results of samples at ambient condition.

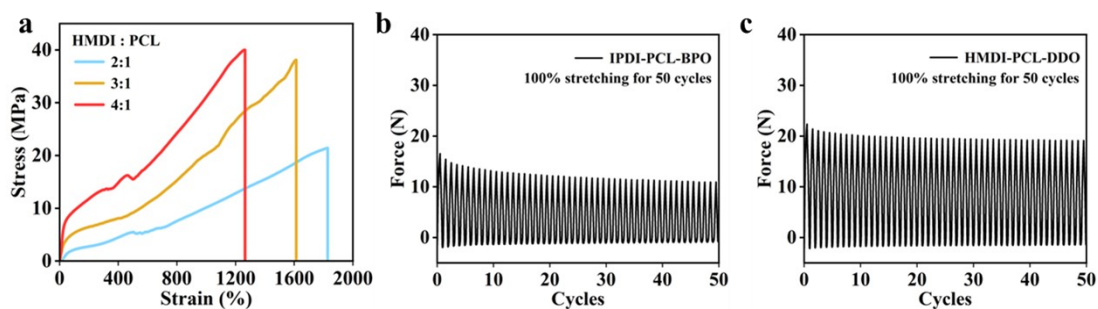

**Figure S9.** (a) Engineering stress-strain curve of HMDI-PCL-BPO samples with different R values. (b)(c) Cyclic stretching tests of IPDI-PCL-BPO (a) and HMDI-PCL-DDO (b) at 100% strain for 50 cycles.

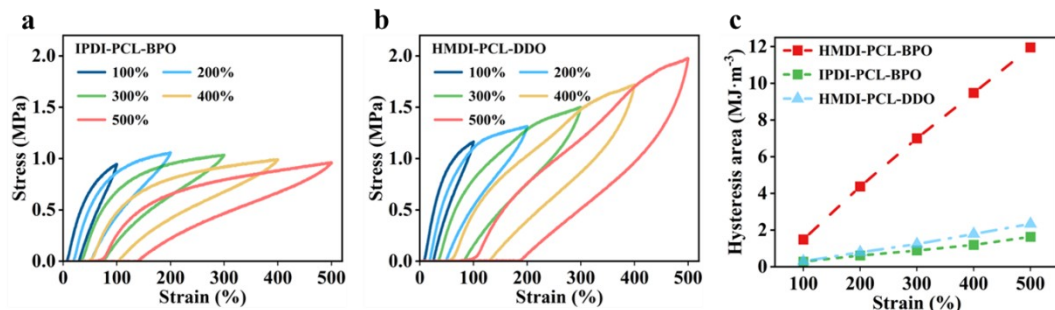

**Figure S10.** (a)(b) Loading-unloading curves of IPDI-PCL-BPO (a) and HMDI-PCL-DDO (b) under different strains. (c) Hysteresis areas of each loading cycle of elastomers.

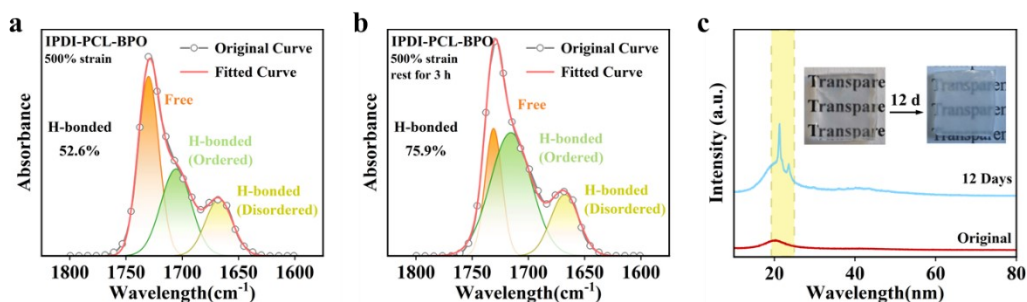

**Figure S11.** (a)(b) FTIR spectra in C=O vibration region of IPDI-PCL-BPO samples being stretched to 500% (a) and then resting for 3 h (b). (c) XRD spectra of IPDI-PCL-BPO being left to stand for 12 days.

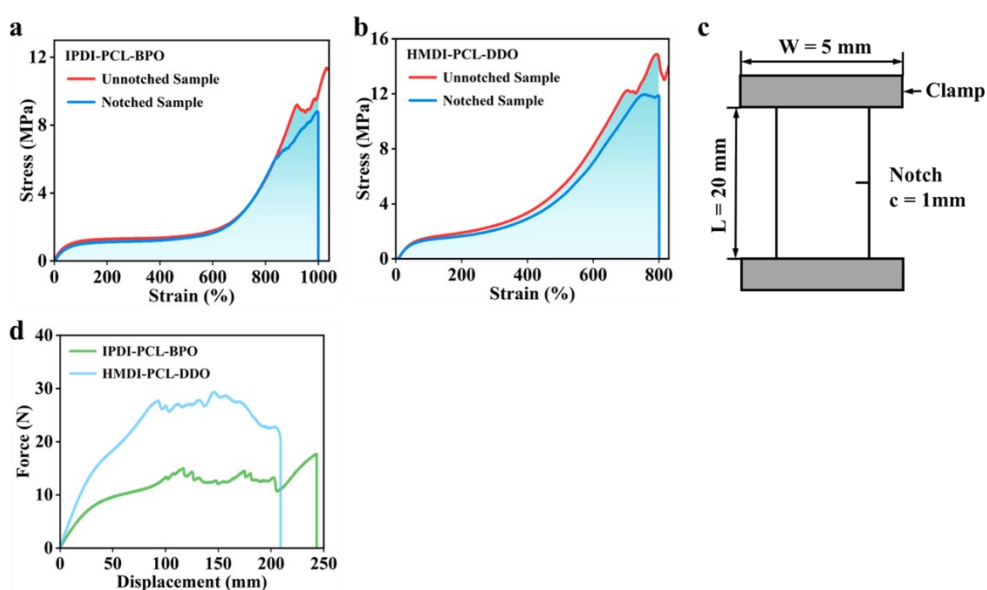

**Figure S12.** (a)(b) Tensile tests performed on notched samples of IPDI-PCL-BPO (a) and HMDI-PCL-DDO (b). (c) Diagram of notched samples. d) Trougher tearing tests of IPDI-PCL-BPO and HMDI-PCL-DDO.

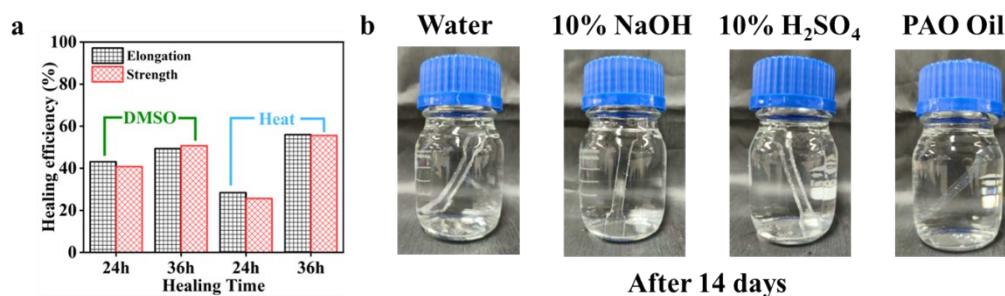

**Figure S13.** (a) Healing efficiency (calculated from the strength and elongation after healing) of HMDI-PCL-BPO versus healing time and healing methods. (b) Photographs of HMDI-PCL-BPO under different degradation conditions over 14 days.

### 3. Supporting Tables

**Table S1. Stoichiometric ratio of samples.**

| Samples                | HMDI<br>[g] | IPDI<br>[g] | PCL<br>[g] | BPO<br>[g] | DDO<br>[g] | $n_{(-NCO)}/$<br>$n_{(-OH)}$ |
|------------------------|-------------|-------------|------------|------------|------------|------------------------------|
| HMDI-PCL-<br>BPO       | 6.3         | /           | 16         | 3.27       | /          | 3:1                          |
| IPDI-PCL-<br>BPO       | /           | 5.4         | 16         | 3.27       | /          | 3:1                          |
| HMDI-PCL-<br>DDO       | 6.3         | /           | 16         | /          | 2.79       | 3:1                          |
| HMDI-PCL-<br>BPO (2:1) | 6.3         | /           | 24         | 2.45       | /          | 2:1                          |
| HMDI-PCL-<br>BPO (4:1) | 6.3         | /           | 12         | 3.68       | /          | 4:1                          |

**Table S2. Summary of molecular weight, polydispersity index, glass transition temperature ( $T_g$ ) and temperature at 5% mass loss.**

| Samples      | Mn<br>[kDa] | Mw/Mn | $T_g$<br>[°C] | Decompose 5%<br>[°C] |
|--------------|-------------|-------|---------------|----------------------|
| HMDI-PCL-BPO | 25.7        | 1.75  | -54.1         | 311                  |
| IPDI-PCL-BPO | 53.1        | 2.39  | -53.5         | 309                  |
| HMDI-PCL-DDO | 60.6        | 1.97  | -49.1         | 313                  |

**Table S3. Summary of subpeaks deconvoluted from FTIR spectra in C=O vibration band and their ratios.**

| Assignment                      |                          | Wavenumber (cm <sup>-1</sup> ) |                      |                      | Area (%)             |                      |                      |
|---------------------------------|--------------------------|--------------------------------|----------------------|----------------------|----------------------|----------------------|----------------------|
|                                 |                          | HMDI-<br>PCL-<br>BPO           | IPDI-<br>PCL-<br>BPO | HMDI-<br>PCL-<br>DDO | HMDI-<br>PCL-<br>BPO | IPDI-<br>PCL-<br>BPO | HMDI-<br>PCL-<br>DDO |
| $\nu(C=O)$<br>urethane          | Free                     | 1731                           | 1731                 | 1731                 | 26.8                 | 27.0                 | 56.3                 |
|                                 | H-bonded<br>(Disordered) | -                              | -                    | 1713                 | -                    | -                    | 14.6                 |
|                                 | H-bonded<br>(Ordered)    | 1716                           | 1716                 | 1694                 | 52.4                 | 56.4                 | 29.1                 |
| $\nu(C=O)$<br>amide             | H-bonded<br>(Disordered) | 1686                           | 1667                 | -                    | 5.4                  | 14.9                 | -                    |
|                                 | H-bonded<br>(Ordered)    | 1660                           | 1635                 | -                    | 15.4                 | 1.7                  | -                    |
| <b>Total degree of H-bonded</b> |                          |                                |                      |                      | <b>73.2</b>          | <b>73.0</b>          | <b>43.7</b>          |

**Table S4. Summary of samples' mechanical properties.**

| Samples      | Engineering stress<br>[MPa] | Elongation at break<br>[%] | Toughness<br>[MJ·m <sup>-3</sup> ] | True stress<br>[MPa] | True elongation<br>[%] |
|--------------|-----------------------------|----------------------------|------------------------------------|----------------------|------------------------|
| HMDI-PCL-BPO | 39.0±1.2                    | 1558.8±38.4                | 275.8±5.2                          | 646.4±19.3           | 2.8±0.02               |
| IPDI-PCL-BPO | 7.2±1.7                     | 1288.1±91.7                | 38.2±11.0                          | 99.9±29.5            | 2.6±0.06               |
| HMDI-PCL-DDO | 14.5±1.2                    | 1584.8±77.6                | 87.5±11.2                          | 243.9±28.1           | 2.8±0.05               |

**Table S5. Comparisons of HMDI-PCL-BPO and other polyurethanes reported in literatures which were synthesized via solvent-free method.**

| Samples      | Engineering stress<br>[MPa] | Elongation at break<br>[%] | Toughness<br>[KJ·m <sup>-3</sup> ] |
|--------------|-----------------------------|----------------------------|------------------------------------|
| HMDI-PCL-BPO | 39.0                        | 1558.8                     | 275.8                              |
| Ref 45       | 38.2                        | 982.5                      | 129.4                              |
| Ref 58       | 15.3                        | 1200                       | 100.8                              |
| Ref 59       | 16                          | 383                        | /                                  |
| Ref 60       | 45.5                        | 621                        | /                                  |
| Ref 61       | 45.12                       | 864.9                      | /                                  |
| Ref 62       | 17.4                        | 497                        | /                                  |
| Ref 63       | 150                         | 16                         | /                                  |
| Ref 64       | 10.9                        | 977                        | /                                  |
| Ref 65       | 32.2                        | 780                        | /                                  |
| Ref 66       | 35                          | 140                        | /                                  |
| Ref 67       | 3.23                        | 70.4                       | /                                  |
| Ref 68       | 17.5                        | 158.7                      | 41.61                              |
| Ref 69       | 20.1                        | 1197.2                     | 66.9                               |
| Ref 70       | 11.5                        | 124.9                      | 13.5                               |

**Table S6. Subpeak distributions, which were deconvoluted from FTIR spectra in C=O vibration band, of HMDI-PCL-BPO and IPDI-PCL-BPO at 500% strain and resting for 180 min.**

| Assignment                    |                          | Wavenumber (cm <sup>-1</sup> ) |              |                  |              | Area (%)     |              |                  |              |
|-------------------------------|--------------------------|--------------------------------|--------------|------------------|--------------|--------------|--------------|------------------|--------------|
|                               |                          | 500% Strain                    |              | Rest for 180 min |              | 500% Strain  |              | Rest for 180 min |              |
|                               |                          | HMDI-PCL-BPO                   | IPDI-PCL-BPO | HMDI-PCL-BPO     | IPDI-PCL-BPO | HMDI-PCL-BPO | IPDI-PCL-BPO | HMDI-PCL-BPO     | IPDI-PCL-BPO |
| $\nu(\text{C=O})$<br>urethane | Free                     | 1732                           | 1730         | 1731             | 1731         | 21.5         | 47.4         | 26.9             | 24.1         |
|                               | H-bonded<br>(Ordered)    | 1716                           | 1706         | 1716             | 1716         | 53.7         | 33.3         | 44.9             | 56.4         |
| $\nu(\text{C=O})$<br>amide    | H-bonded<br>(Disordered) | 1688                           | 1667         | 1686             | 1667         | 5.9          | 19.3         | 12.6             | 19.5         |
|                               | H-bonded<br>(Ordered)    | 1665                           | -            | 1660             | -            | 18.9         | -            | 15.6             | -            |

|                                 |             |             |             |             |
|---------------------------------|-------------|-------------|-------------|-------------|
| <b>Total degree of H-bonded</b> | <b>78.5</b> | <b>52.6</b> | <b>73.1</b> | <b>75.9</b> |
|---------------------------------|-------------|-------------|-------------|-------------|

#### 4. References

- 1 H. W. Greensmith, 1963, 7, 993-1002, DOI: 10.1002/app.1963.070070316
